# Supplementary material
Source: PubMed Central journal article supplement (PMC9979971)
Supplement: NIHMS1868772-supplement-Supplemental_figures.pdf [file NIHMS1868772-supplement-Supplemental_figures.pdf]

**Figure 1**

**Neon**

**Texas red**

**Merge**

**2%**

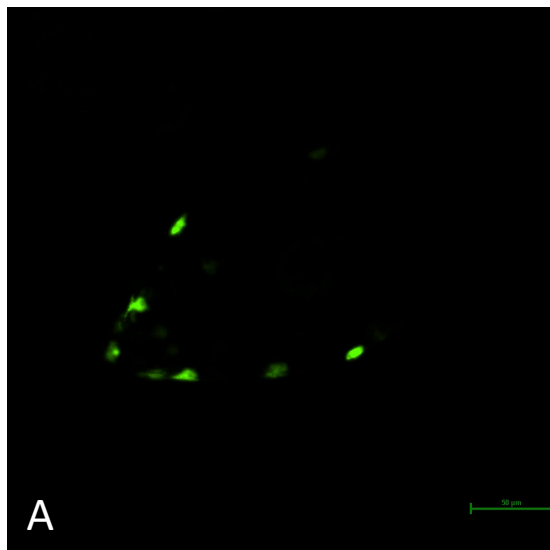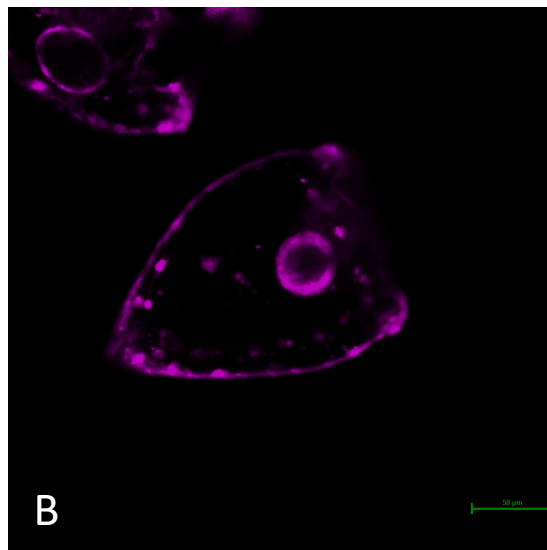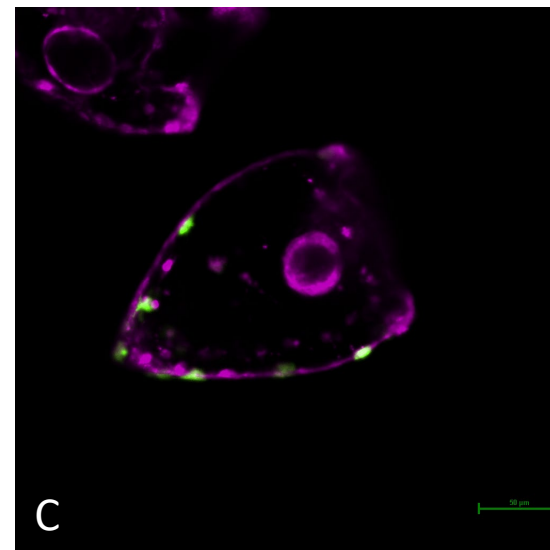

**98%**

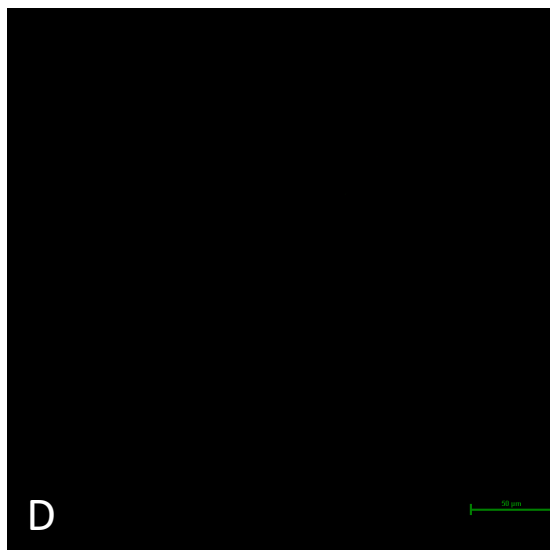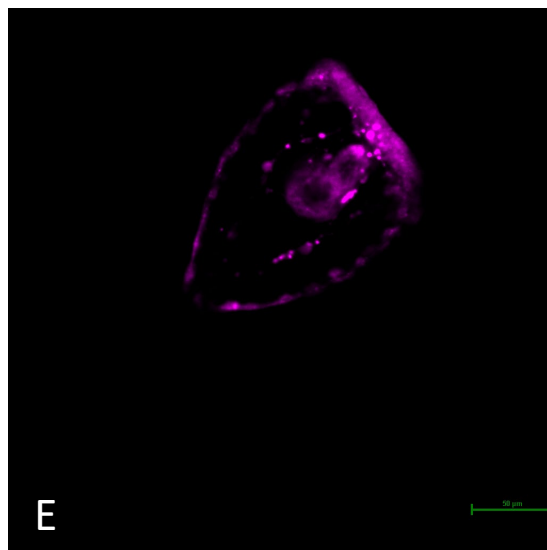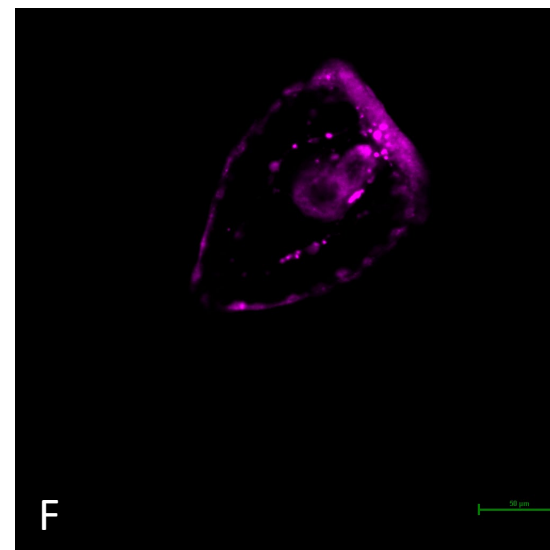

Figure 2

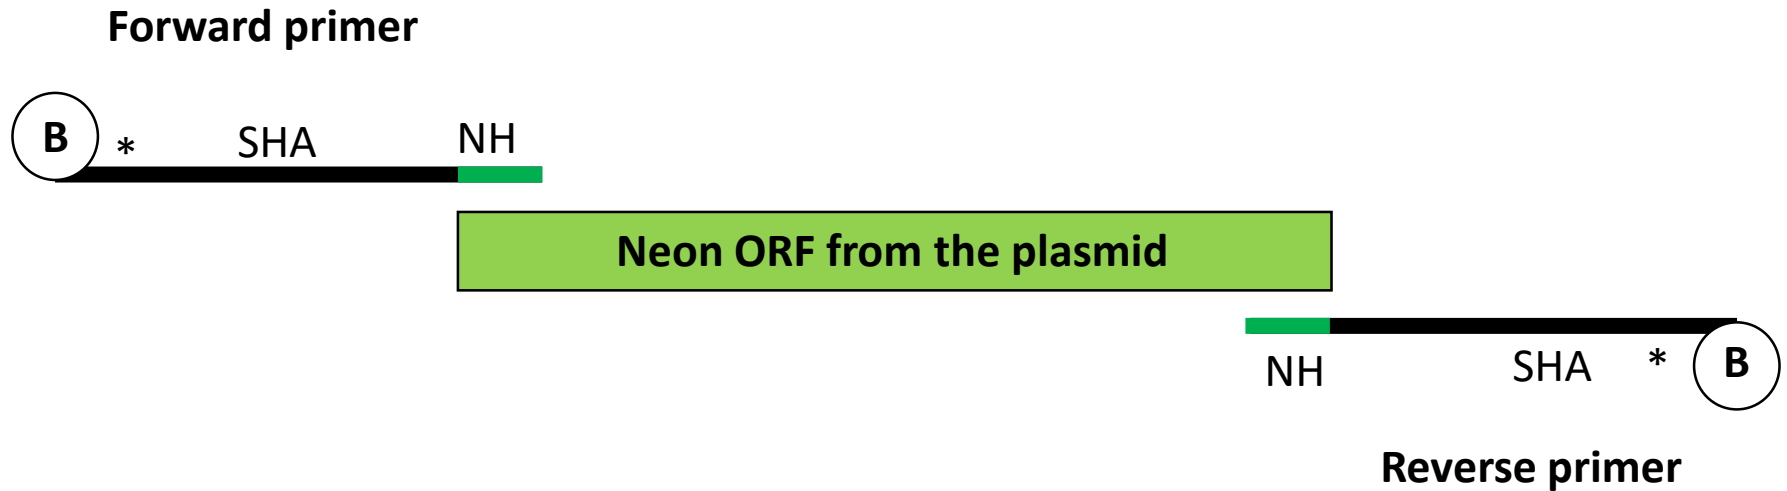

**Primers to make the donor DNA:**

B: Biotin

\* : phosphorothioate bond of the first 5 bases to prevent degradation by nucleases

SHA: Short homology arm from the targeted gene (30 to 40 bp)

NH: neon homology (18 to 21 bp)

**Fig.S1**

| <b>Cas9</b>    | <b>DNA donor</b>                      | <b>Strand</b> | <b>Homology arms</b> | <b>phenotype</b> | <b>knock-in (microscope)</b> |
|----------------|---------------------------------------|---------------|----------------------|------------------|------------------------------|
| mRNA           | Plasmid                               | double        | 1kb                  | 100% albinos     | inconsistent                 |
| IDT 2uM        | PCR PKS 20 ng/ul                      | double        | 40 nt                | Died at blastula | X                            |
| IDT 2uM        | PCR PKS 1 ng/ul                       | double        | 40 nt                | 100% albinos     | 0%                           |
| IDT 2uM        | PCR biotin PKS 1 ng/ul                | double        | 40 nt                | 100% albinos     | 0%                           |
| mRNA           | PCR biotin PKS 1 ng/ul                | double        | 40 nt                | 100% albinos     | 0%                           |
| <b>mRNA</b>    | <b>PCR biotin PKS 10 ng/ul (23nM)</b> | double        | 40 nt                | 100% albinos     | <b>2%</b>                    |
| <b>IDT 2uM</b> | <b>PCR biotin PKS 10 ng/ul (23nM)</b> | double        | 40 nt                | 100% albinos     | <b>2%</b>                    |
| mRNA           | PCR biotin PKS (23nM)                 | double        | 200 nt               | 100% albinos     | 0.5%                         |
| mRNA           | Megamer PKS (23 nM)                   | single        | 40 nt                | 100% albinos     | 0%                           |

Fig.S2

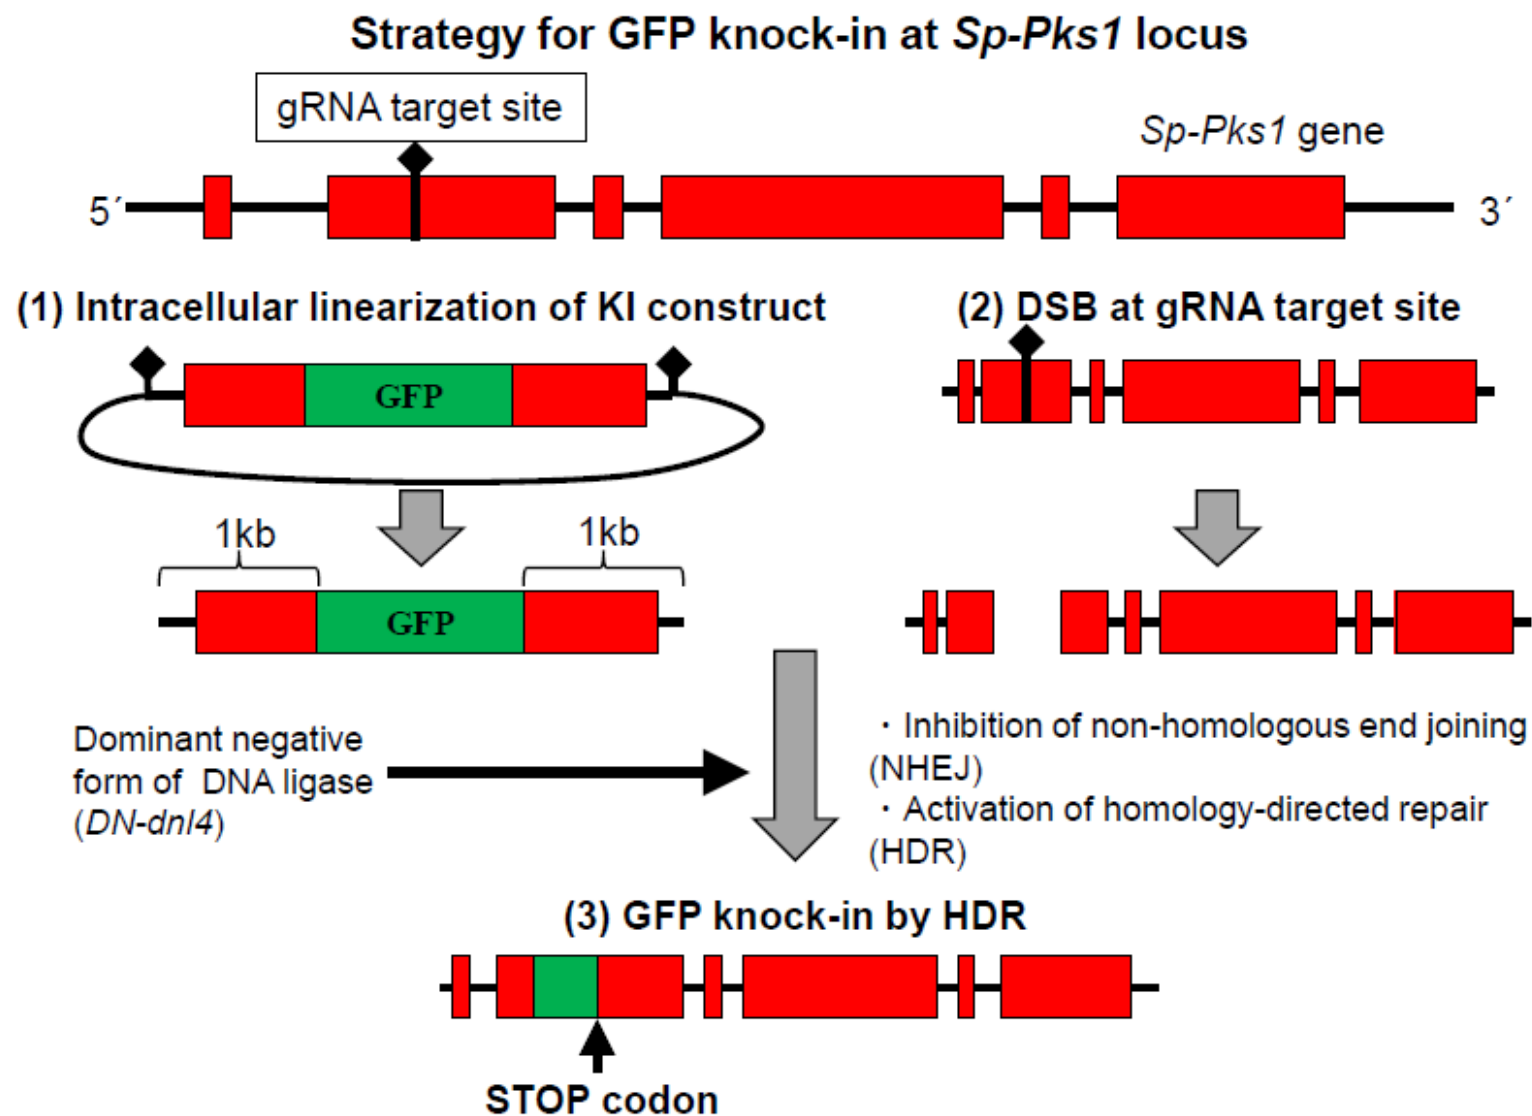

Fig.S3

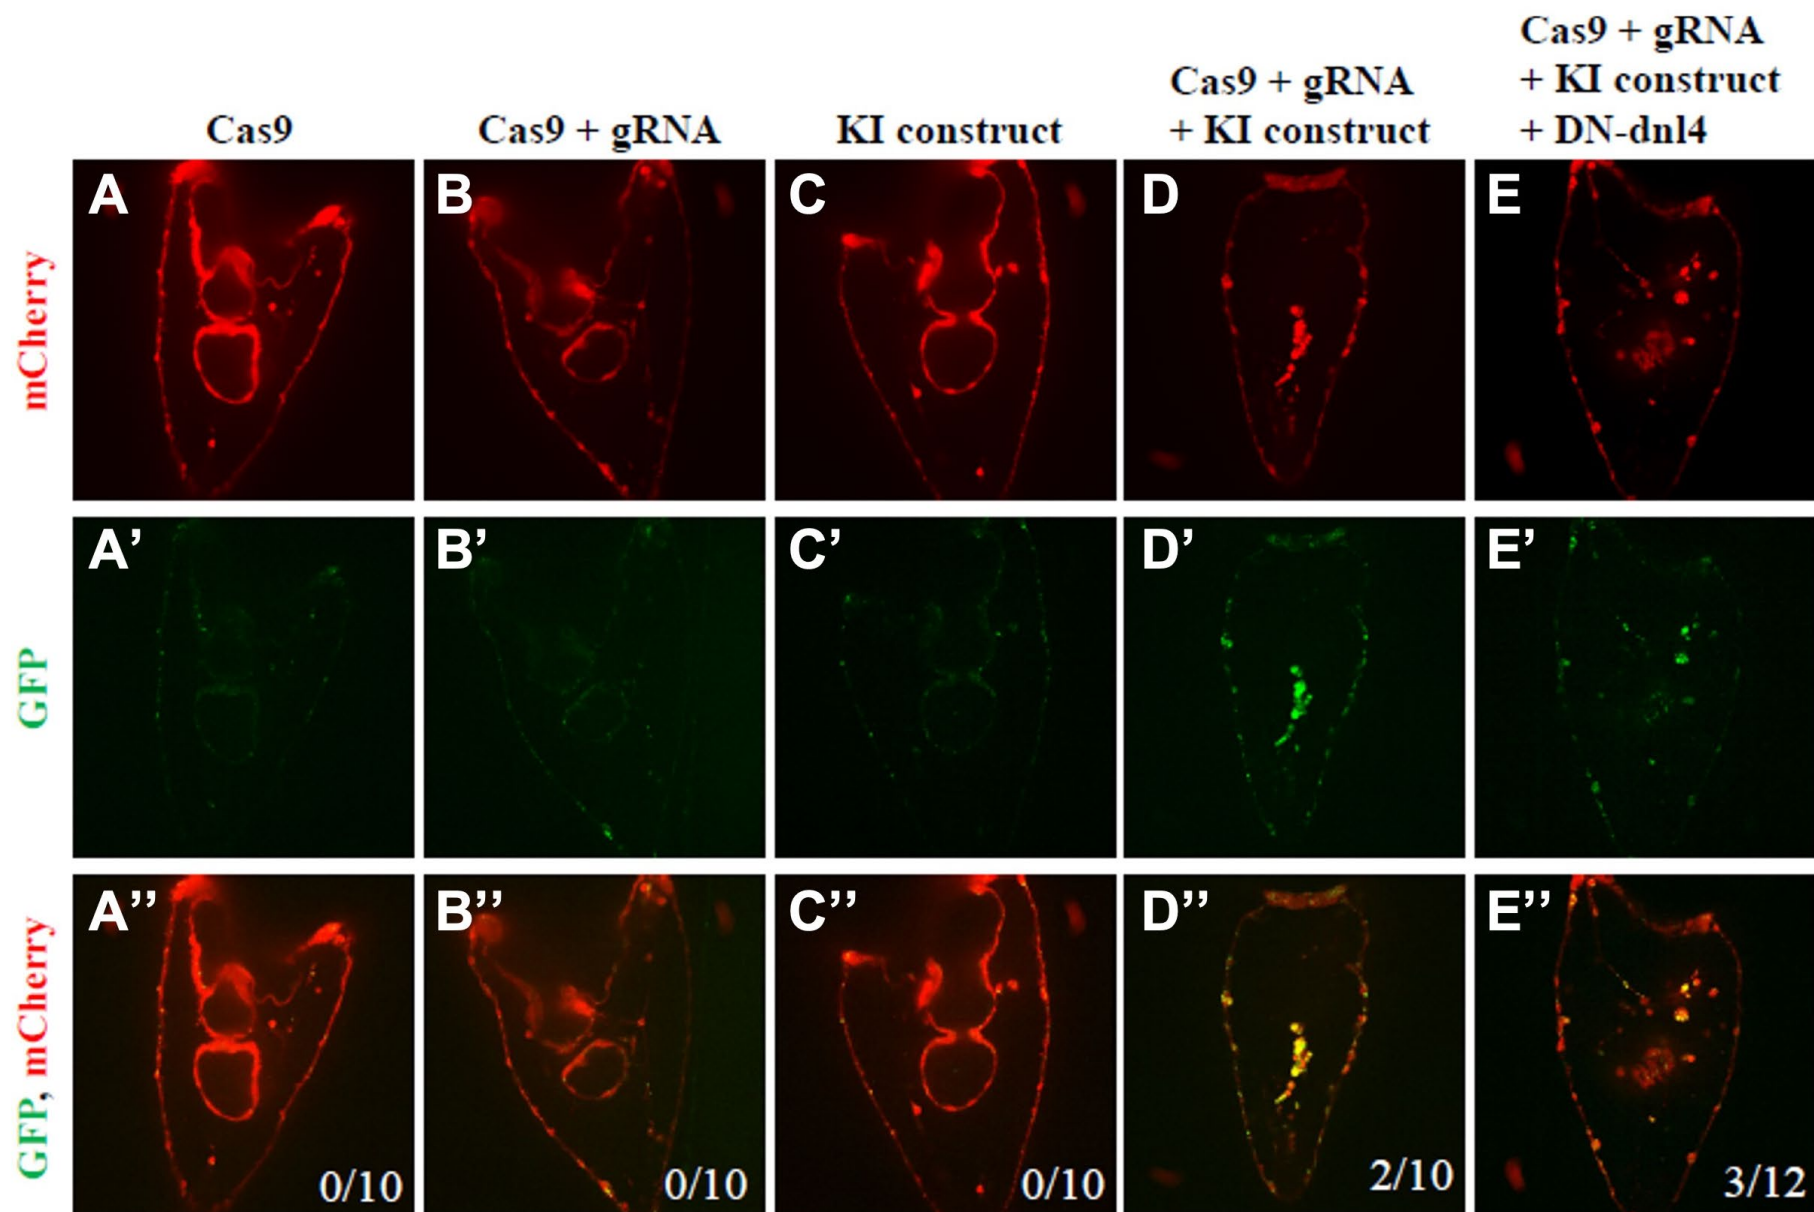

Fig.S4

bp  
1500  
1000  
850  
650  
500  
400  
300  
200  
100

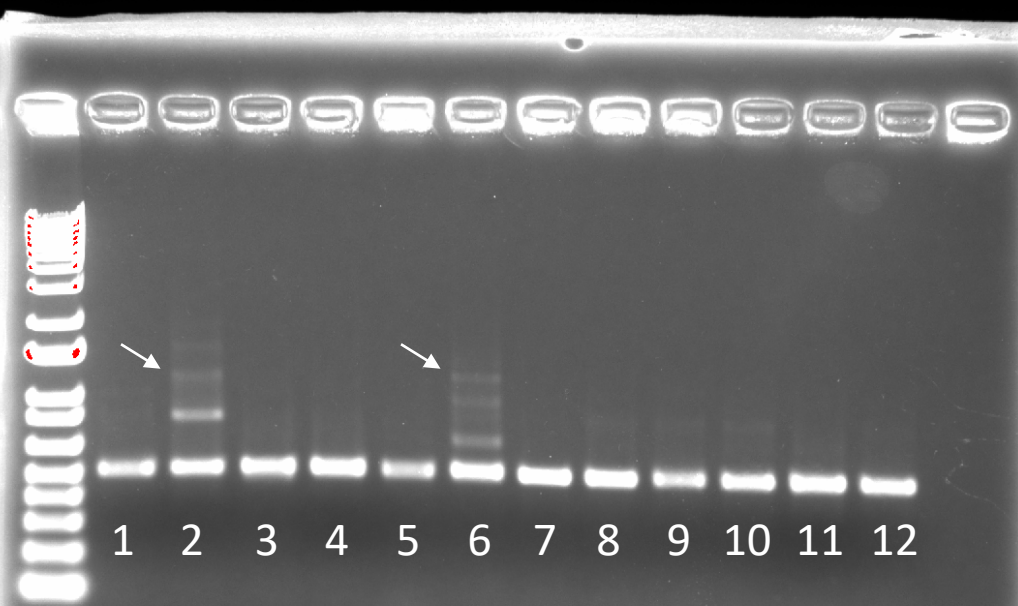

bp  
1500  
1000  
850  
650  
500  
400  
300  
200  
100

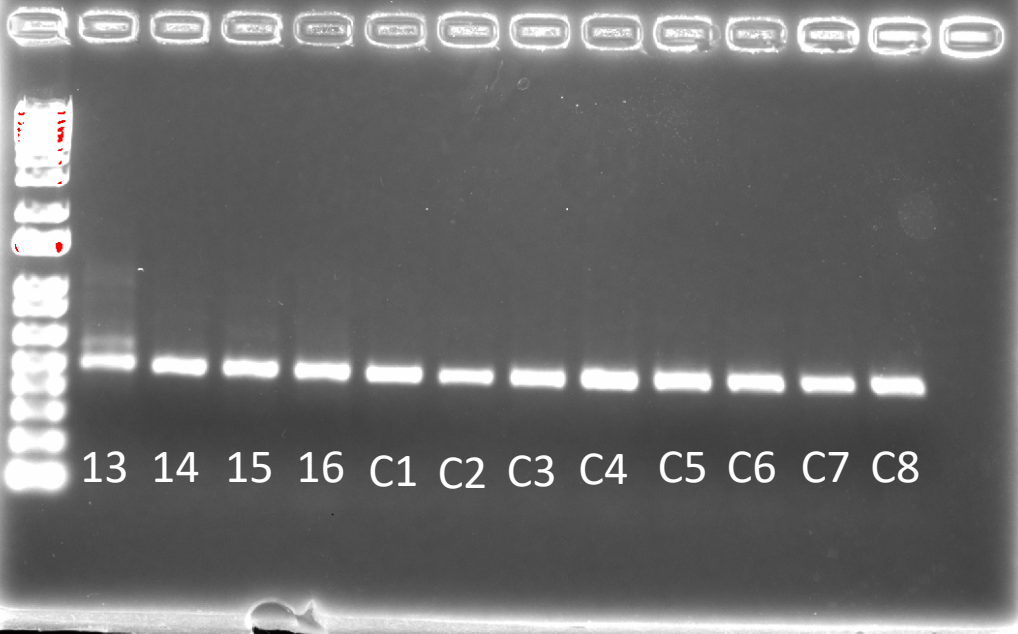

**Fig.S5**

GACATCACAGTCGGGTTTCAGCGCCCTTGGTGTCTCTCACCCAGATGGCCGTTGCAGTCCCTTCT  
CAAGTACCGCCAATGGCTACGTCCGCAGTGAAGGATGGGGCGCCATTGTGAGCAAGGGCGAGGA  
GGATAACATGGCCTCTCTCCCAGCGACACATGAGTTACACATCTTTGGCTCCATCAACGGTGTG  
GACTTTGACATGGTGGGTCAGGGCACCGGCAATCCAAATGATGGTTATGAGGAGTTAAACCTGA  
AGTCCACCAAGGGTGACCTCCAGTTCTCCCCCTGGATTCTGGTCCCTCATATCGGGTATGGCTT  
CCATCAGTACCTGCCCTACCCTGACGGGATGTCGCCTTTCCAGGCCGCCATGGTAGATGGCTCC  
GGCTACCAAGTCCATCGCACAAATGCAGTTTGAAGATGGTGCCTCCCTTACTGTTAACTACCGCT  
ACACCTACGAGGGAAGCCACATCAAAGGAGAGGCCAGGTGAAGGGGACTGGTTTTCCCTGCTGA  
CGGTCCTGTGATGACCAACTCGCTGACCGCTGCGGACTGGTGCAGGTCGAAGAAGACTTACCCC  
AACGACAAAACCATCATCAGTACCTTTAAGTGGAGTTACACCACTGGAAATGGCAAGCGCTACC  
GGAGCACTGCGCGGACCACCTACACCTTTGCCAAGCCAATGGCGGCTAACTATCTGAAGAACCA  
GCCGATGTACGTGTTCCGTAAGACGGAGCTCAAGCACTCCAAGACCGAGCTCAACTTCAAGGAG  
TGGCAAAAGGCCTTTACCGATGTGATGGGCATGGACGAGCTGTACAAGGTCCTCAAACCCCTCA  
GCCAGGCTCTTGCTGACAATGACCACATCTATACTGTCATACGCGGTAGCGCCATCGCAGCCAA  
TGGGTTAGCCAACAGTTTGACCATGCCATCTCCTCCTGCTCAGGAGTACGTCATGAAGGAAGCC  
TATGAGAAGTTCGGTGTATCCATGTCCGATGTGCACTATGTCGGAGCTCACGGCACCGGAACCA  
TGGTTGGTGATCCTCTGGAAGCAGAGGCCATCTCCAGGGCATTCAACCGCACCAAAGACAACCC  
TCTCAAGATTGGATCCGTAAAGAGCAACTTTGGACATACCGAGGTTGCTGCCGGAGTGACAGCT  
GCCATCAAAGTCGCCTTGATGATGGAGAACCGTACCATCCCACCAACCATCAATTTCGTCTCTT  
CAAACCCCACATCGACCCTGAAGAGATG

**Fig.S6**

*Sp* PKS1 control:

DITVGFSALGVLSPDGRCSFSTANGYVRSEGWGAIVLKPLSQALADNDHIYTVIRGSAIAANGLANS  
LTMPSPPAQEYVMKEAYEKFGVSMDSVHYVEAHGTGTMVGDPLEAEAISRAFNRTKDNPLKIGSVKS  
NFGHTEVAAGVTAAIKVALMMENRTIPPTINFVSSNPHIDPEEM

*Sp* PKS1 neon knock in:

DITVGFSALGVLSPDGRCSFSTANGYVRSEGWGAIVSKGEEDNMA SLPATHELHIFGSINGVDFDM  
VGQGTGNPNDGYEELNLKSTKGD LQFSPWILVPHIGYGFHQYLPYPDGMSPFQAAMVDGSGYQVH  
RTMQFEDGASLTVNYRYTYEGSHIKGEAQVKGTGFPADGPVMTNSLTAADWCRSKKTYPNDKTIISTF  
KWSYTTGNGKRYRSTARTTYTFAKPMAANYLKNQPMYVFRKTELKHSKTELNFKEWQKAFTDVMG  
MDELYKVLKPLSQALADNDHIYTVIRGSAIAANGLANS LTMPSPPAQEYVMKEAYEKFGVSMDSVHY  
VGAHGTGTMVGDPLEAEAISRAFNRTKDNPLKIGSVKSNFGHTEVAAGVTAAIKVALMMENRTIPPTI  
NFVSSNPHIDPEEM
